# Supplementary material
Source: Research Square preprint supplement (doi:10.21203/rs.3.rs-8980486/v1)
Supplement: Supplementary file 1 [file 0cb4b5f2e94f2b60543370f8.docx]

# Scoring systems

## Score Figure 1: Pediatric Anesthesia Emergence Delirium (PAED) scale

| Behavior | Not at all | Just a little | Quite a bit | Very much | Extremely |
| --- | --- | --- | --- | --- | --- |
| Makes eye contact | 4 | 3 | 2 | 1 | 0 |
| Actions are purposeful | 4 | 3 | 2 | 1 | 0 |
| Aware of surroundings | 4 | 3 | 2 | 1 | 0 |
| Restless | 0 | 1 | 2 | 3 | 4 |
| Inconsolable | 0 | 1 | 2 | 3 | 4 |

Total PAED score ranges from 0 to 20, with higher scores indicating more severe emergence agitation.

1—Calm;

2—not calm but could be easily consoled;

3—moderately agitated or restless and not easily calmed;

4—combative, excited, thrashing around.

## Score Figure 2: FLACC behavioral pain scale

| Category | Score 0 | Score 1 | Score 2 |
| --- | --- | --- | --- |
| Face | No particular expression or smile | Occasional grimace or frown; withdrawn or uninterested | Frequent or constant quivering chin; clenched jaw |
| Legs | Normal position or relaxed | Uneasy, restless, or tense | Kicking or legs drawn up |
| Activity | Lying quietly, normal position, moves easily | Squirming or shifting; tense | Arched, rigid, or jerking |
| Cry | No cry (awake or asleep) | Moans or whimpers; occasional complaint | Crying steadily; screams or sobs; frequent complaints |
| Consolability | Content, relaxed | Reassured by occasional touching, hugging, or talking; distractible | Difficult to console or comfort |

Each category is scored from 0 to 2; total FLACC score ranges from 0 to 10, with higher scores indicating greater pain intensity.

## Score Figure 3: Modified Aldrete Scoring (MAS) system

| Category | Score 2 | Score 1 | Score 0 |
| --- | --- | --- | --- |
| Activity | Moves all extremities voluntarily or on command | Moves two extremities voluntarily or on command | Unable to move extremities voluntarily or on command |
| Respiration | Able to breathe deeply and cough freely | Dyspnea or limited breathing | Apneic or on mechanical ventilation |
| Circulation | Blood pressure within ±20% of pre-anesthetic level | Blood pressure 20–49% above or below pre-anesthetic level | Blood pressure ≥50% above or below pre-anesthetic level |
| Consciousness | Fully awake | Arousable on calling | Not responding |
| Oxygenation | Maintains SpO₂ >92% on room air | Needs supplemental O₂ to keep SpO₂ >90% | SpO₂ <90% despite supplemental O₂ |

The total MAS ranges from 0 to 10. A score ≥9 is commonly used as a criterion for safe discharge from the PACU.
