# Supplementary material
Source: Research Square preprint supplement (doi:10.21203/rs.3.rs-8980486/v1)
Supplement: Supplementary file 2 [file 67379808693abb8d0e76da72.docx]

**CONSORT 2010 Checklist**

Manuscript: Different anesthetic approaches on postoperative emergence agitation in pediatric patients undergoing adenotonsillectomy: a prospective randomized study

| **Section/Topic** | **Item No.** | **Checklist item** | **Reported on page no.** |
| --- | --- | --- | --- |
| Title and abstract | 1a | Identification as a randomised trial in the title | p1 (Title) |
| Title and abstract | 1b | Structured summary of trial design, methods, results, and conclusions (for specific guidance see CONSORT for abstracts) | p1–2 (Abstract) |
| Introduction | 2a | Scientific background and explanation of rationale | p2 (Background) |
| Introduction | 2b | Specific objectives or hypotheses | p2 (end of Background) |
| Methods | 3a | Description of trial design (such as parallel) including allocation ratio | p3 (Methods: Randomization and anesthetic management; allocation ratio not stated) |
| Methods | 3b | Important changes to methods after trial commencement (such as eligibility criteria), with reasons | Not reported (no changes described) |
| Methods | 4a | Eligibility criteria for participants | p3 (Methods: Patients) |
| Methods | 4b | Settings and locations where the data were collected | p3 (Methods: Study design and ethics) |
| Methods | 5 | The interventions for each group with sufficient details to allow replication, including how and when they were actually administered | p3 (Methods: Randomization and anesthetic management) |
| Methods | 6a | Completely defined pre-specified primary and secondary outcome measures, including how and when they were assessed | p3–4 (Methods: Postoperative evaluation) |
| Methods | 6b | Any changes to trial outcomes after the trial commenced, with reasons | Not reported (no changes described) |
| Methods | 7a | How sample size was determined | Not reported |
| Methods | 7b | When applicable, explanation of any interim analyses and stopping guidelines | Not applicable / Not reported (no interim analyses described) |
| Methods | 8a | Method used to generate the random allocation sequence | p3 (computer-generated sequence) |
| Methods | 8b | Type of randomisation; details of any restriction (such as blocking and block size) | Not reported |
| Methods | 9 | Mechanism used to implement the random allocation sequence (such as sequentially numbered containers), describing any steps taken to conceal the sequence until interventions were assigned | Not reported |
| Methods | 10 | Who generated the random allocation sequence, who enrolled participants, and who assigned participants to interventions | Not reported |
| Methods | 11a | If done, who was blinded after assignment to interventions (for example, participants, care providers, those assessing outcomes) and how | p4 (assessors separate from intraoperative team; blinding not fully described) |
| Methods | 11b | If relevant, description of the similarity of interventions | Not applicable (distinct pharmacologic interventions) |
| Methods | 12a | Statistical methods used to compare groups for primary and secondary outcomes | p4 (Methods: Statistical analysis) |
| Methods | 12b | Methods for additional analyses, such as subgroup analyses and adjusted analyses | Not reported |
| Results | 13a | For each group, the numbers of participants who were randomly assigned, received intended treatment, and were analysed for the primary outcome | p4 (Results; Figure A referenced) |
| Results | 13b | For each group, losses and exclusions after randomisation, together with reasons | p4 (Results; losses/exclusions not detailed in text; Figure A referenced) |
| Results | 14a | Dates defining the periods of recruitment and follow-up | Not reported |
| Results | 14b | Why the trial ended or was stopped | Not reported (routine completion implied) |
| Results | 15 | A table showing baseline demographic and clinical characteristics for each group | p4 (Results: Table 1 referenced) |
| Results | 16 | For each group, number of participants (denominator) included in each analysis and whether the analysis was by original assigned groups | p4 (Results; analysis approach—e.g., ITT/per-protocol—not stated) |
| Results | 17a | For each primary and secondary outcome, results for each group, and the estimated effect size and its precision (such as 95% confidence interval) | p4 (Results; p-values reported; effect sizes/CIs not reported) |
| Results | 17b | For binary outcomes, presentation of both absolute and relative effect size is recommended | Not applicable / Not reported |
| Results | 18 | Results of any other analyses performed, including subgroup analyses and adjusted analyses, distinguishing pre-specified from exploratory | Not reported |
| Results | 19 | All important harms or unintended effects in each group (for specific guidance see CONSORT for harms) | p4 (Results: complication rates and PONV discussed) |
| Discussion | 20 | Trial limitations, addressing sources of potential bias, imprecision, and, if relevant, multiplicity of analyses | p7 (Discussion: limitations paragraph) |
| Discussion | 21 | Generalisability (external validity, applicability) of the trial findings | p6–7 (Discussion) |
| Discussion | 22 | Interpretation consistent with results, balancing benefits and harms, and considering other relevant evidence | p5–7 (Discussion) |
| Other information | 23 | Registration number and name of trial registry | P2-7 (Declarations: Clinical Trial Registry NCT07433231) |
| Other information | 24 | Where the full trial protocol can be accessed, if available | Not reported |
| Other information | 25 | Sources of funding and other support (such as supply of drugs), role of funders | p8 (Declarations: Funding) |
