# Supplementary material
Source: Research Square preprint supplement (doi:10.21203/rs.3.rs-8980486/v1)
Supplement: Supplementary file 3 [file aef496f2efe6332ff7cf2a7a.docx]

Analyzed

Follow-up

Allocation

Enrollment

Flow diagram of the study (CONSORT diagram)
